# Supplementary material
Source: PubMed Central journal article supplement (PMC6453529)

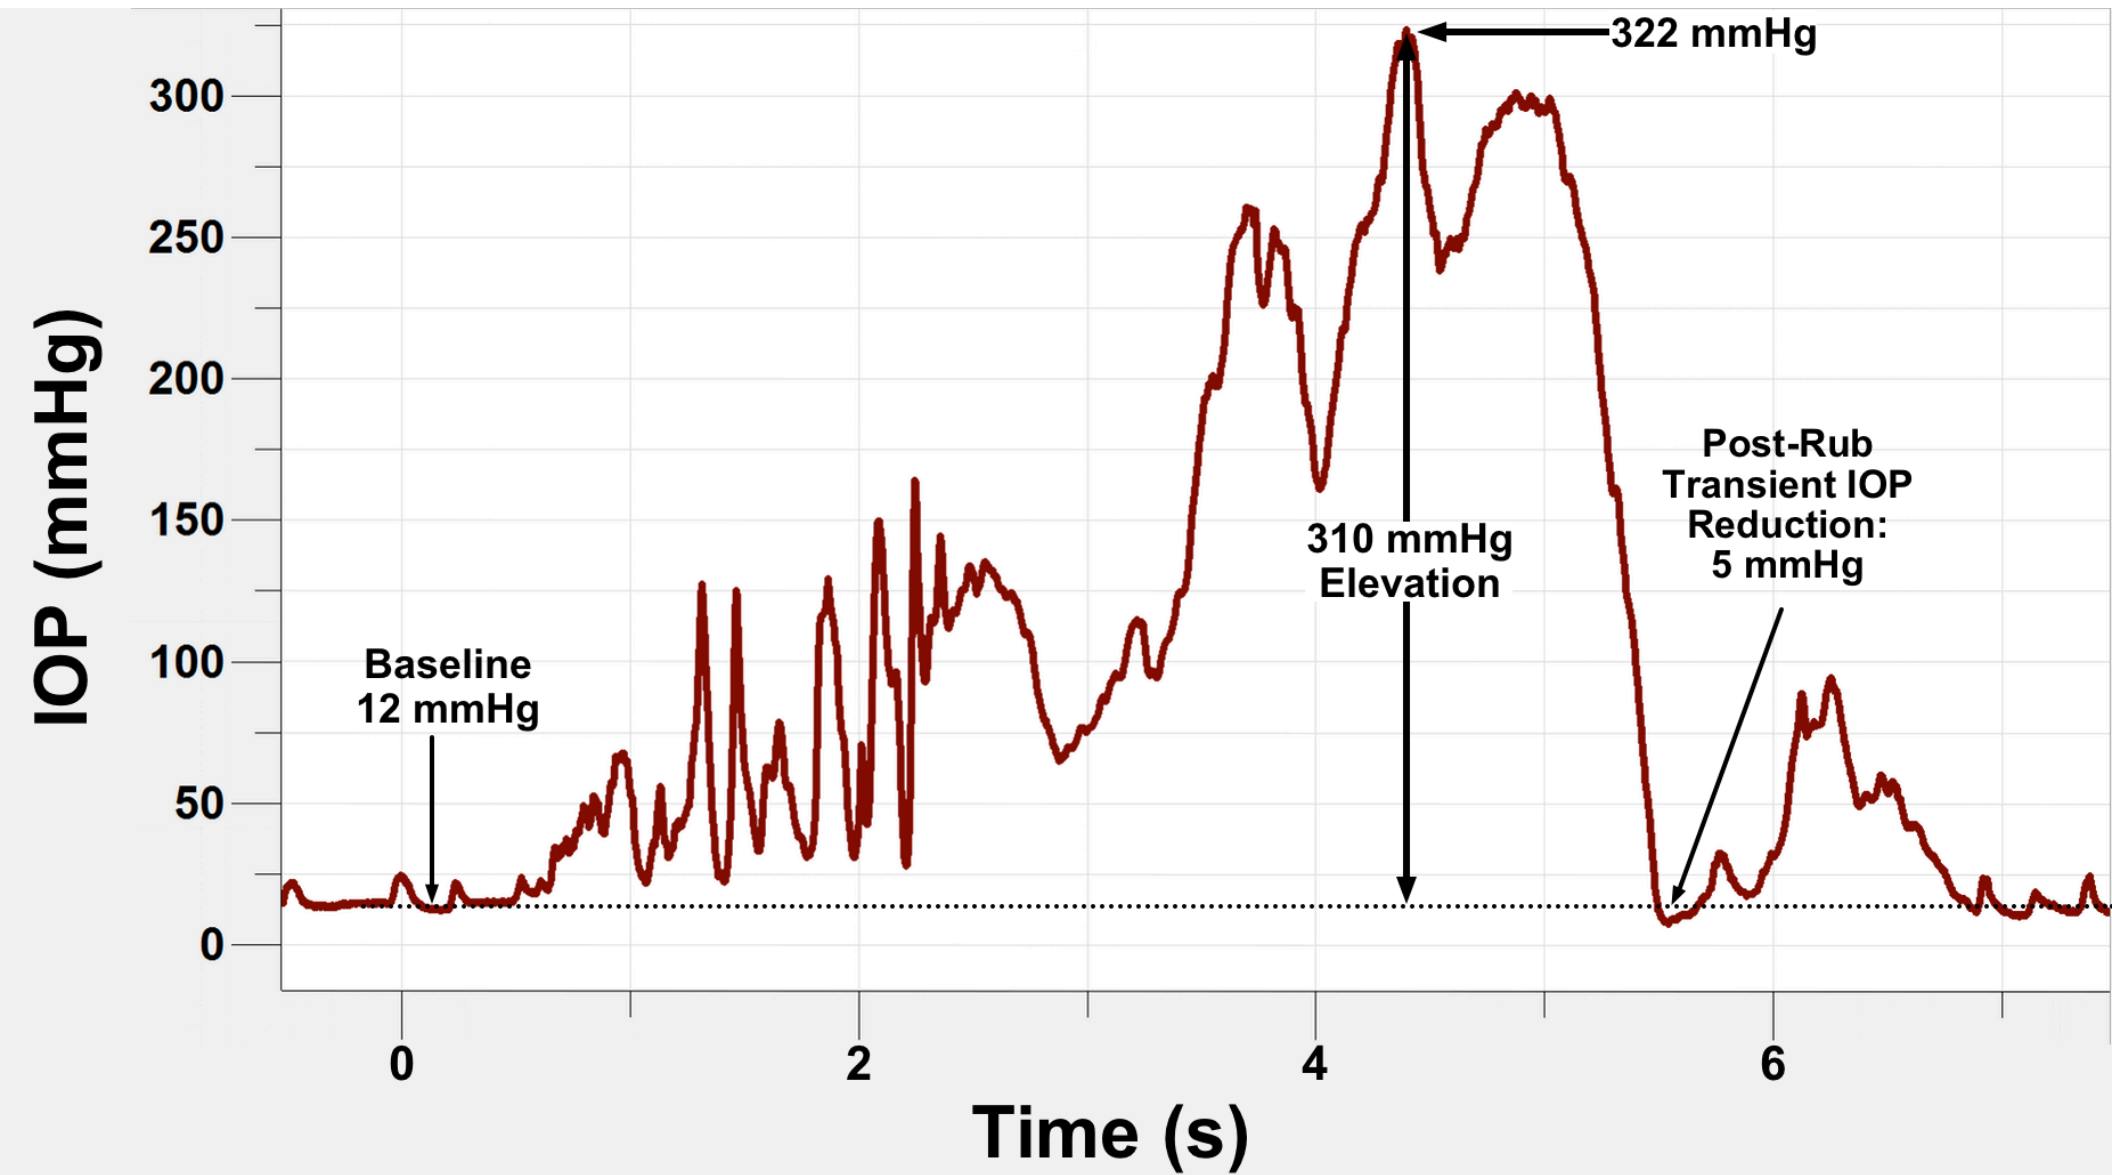

Supplement: NIHMS1505408-supplement-1.pdf [file NIHMS1505408-supplement-1.pdf]

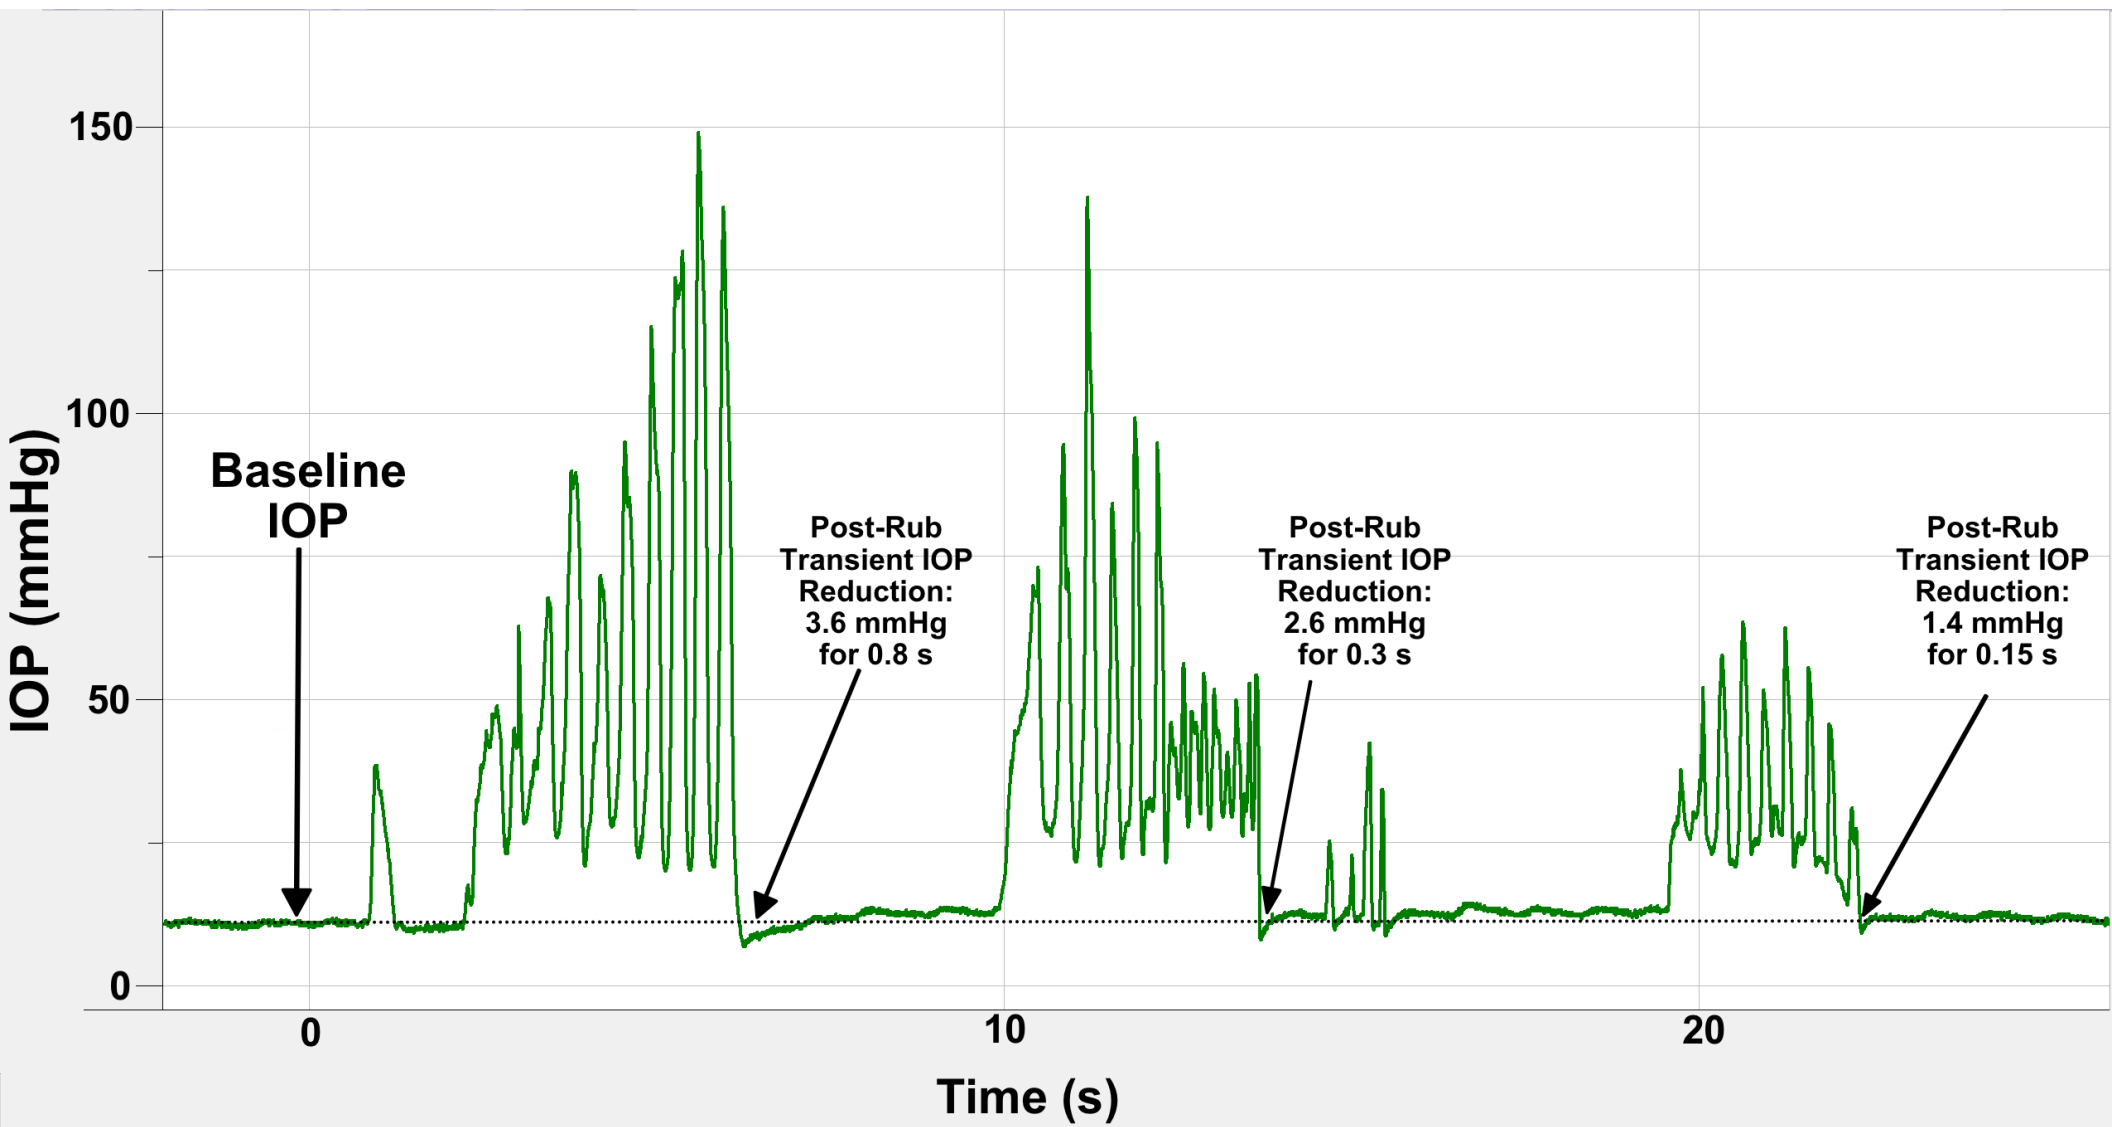

Supplement: NIHMS1505408-supplement-2.pdf [file NIHMS1505408-supplement-2.pdf]
